# Supplementary material for: The constitutive behavior of ammonium ionic liquids: a physiochemical approach
Source: Royal Society of Chemistry journal article supplement (doi:10.1039/c5ra02391b), 2015-01-01
Supplement: c5ra02391b1.pdf [file c5ra02391b1.pdf]

## **Supplementary information**

### ***The Constitutive Behavior of Ammonium Ionic Liquids: A Physiochemical Approach***

*Akash Kumar Gupta and Ramesh L. Gardas\**

Department of Chemistry, Indian Institute of Technology Madras, Chennai - 600 036, INDIA

\*Corresponding author: Phone: +91 44 2257 4248; Fax: +91 44 2257 4202

E-mail: [gardas@iitm.ac.in](mailto:gardas@iitm.ac.in) ; Web: <http://www.iitm.ac.in/info/fac/gardas>

---

#### *Table of Contents*

- 1) Further reading and data sources
- 2) Tables S1. List of chemicals employed and their nature
- 3) Table S2. Experimental and predicted density data through group contribution approach, of BDMAACE in validation of Thermodynamic profile at different temperatures and atmospheric pressure along with AARD in correlation
- 4) Table S3. Parameters of the contributing groups for correlations of experimental data
- 5) Table S4. Consistency of Constitutive properties and Wada's formulism in context to ionic liquids

#### **1) Further reading and data sources (accessed on 27 April 2015)**

- Anton Paar Density Meter (DSA 5000M): <http://www.anton-paar.com/corp-en/products/details/density-and-sound-velocity-meter-dsa-5000-m/density-meter/>
- JASCO FTIR: <http://www.jascoint.co.jp/asia/products/spectroscopy/ftir/ftir4100.html>
- Bruker NMR: <http://www.bruker.com/products/mr/nmr/avance-iii-hd/overview.html>
- Waters ESI-MS: [http://www.waters.com/waters/en\\_IN/Xevo-G2-XS-Tof/nav.htm?cid=134798183&locale=en\\_IN](http://www.waters.com/waters/en_IN/Xevo-G2-XS-Tof/nav.htm?cid=134798183&locale=en_IN)

2) **Table S1.** List of chemicals employed and their nature.

| Component            | Source        | Purity | CAS Number |
|----------------------|---------------|--------|------------|
| Benzylmethanamine    | Sigma Aldrich | >97.0% | 103-67-3   |
| Benzylidimethanamine | Sigma Aldrich | >99.0% | 103-83-3   |
| Acetic acid          | Merck         | 99.8%  | 64-19-7    |
| Propionic acid       | Qualizens     | 99.0%  | 79-09-4    |
| Butanoic acid        | Sigma Aldrich | >99.0% | 107-92-6   |
| Pentanoic acid       | Sigma Aldrich | >99.0% | 109-52-4   |
| Hexanoic acid        | Sigma Aldrich | >99.0% | 142-62-1   |
| Heptanoic acid       | Alfa Aesar    | >98.0% | 111-14-8   |
| Octanoic acid        | Alfa Aesar    | >98.0% | 124-07-2   |

3) **Table S2.** Experimental and predicted density data through group contribution approach, of BDMAACE in validation of Thermodynamic profile at different temperatures and atmospheric pressure along with AARD in correlation.

| $\rho/\text{kg.m}^{-3}$ |          |          |          |         |          |         |                 |
|-------------------------|----------|----------|----------|---------|----------|---------|-----------------|
| T/K                     | BMAPRO   | BMABUT   | BMAPENT  | BMAHEX  | BMAHEPT  | BMAOCT  | BDMAACE (Exp.)  |
| 293.15                  | 1036.587 | 1019.840 | 1002.451 | 989.311 | 978.889  | 968.510 | 1001.310        |
| 298.15                  | 1032.281 | 1015.754 | 998.361  | 985.196 | 974.979  | 964.627 | 996.864         |
| 303.15                  | 1027.912 | 1011.606 | 994.210  | 981.048 | 971.006  | 960.694 | 992.417         |
| 308.15                  | 1023.500 | 1007.400 | 990.024  | 976.904 | 966.998  | 956.731 | 987.968         |
| 313.15                  | 1019.056 | 1003.156 | 985.807  | 972.692 | 962.961  | 952.746 | 983.516         |
| 318.15                  | 1014.576 | 998.878  | 981.560  | 968.440 | 958.898  | 948.737 | 979.057         |
| 323.15                  | 1010.070 | 994.572  | 977.280  | 964.202 | 954.808  | 944.705 | 974.596         |
| 328.15                  | 1005.532 | 990.233  | 972.971  | 959.911 | 950.689  | 940.647 | 970.124         |
| 333.15                  | 1000.961 | 985.861  | 968.631  | 955.553 | 946.533  | 936.568 | 965.643         |
| 338.15                  | 996.355  | 981.454  | 964.260  | 951.252 | 942.358  | 932.464 | 961.151         |
| 343.15                  | 991.715  | 977.014  | 959.856  | 946.855 | 938.152  | 928.334 | 956.644         |
| % AARD                  | 1.219    | 1.118    | 0.048    | 1.014   | 0.183    | 0.127   | -               |
| T/K                     | BDMAPRO  | BDMABUT  | BDMAPENT | BDMAHEX | BDMAHEPT | BDMAOCT | BDMAACE (Pred.) |
| 293.15                  | 988.370  | 975.116  | 965.381  | 950.725 | 942.786  | 934.678 | 999.986         |
| 298.15                  | 983.950  | 970.785  | 961.202  | 946.617 | 938.768  | 930.720 | 995.641         |
| 303.15                  | 979.519  | 966.450  | 957.007  | 942.503 | 934.729  | 926.752 | 991.278         |
| 308.15                  | 975.089  | 962.110  | 952.805  | 938.408 | 930.690  | 922.779 | 986.895         |
| 313.15                  | 970.647  | 957.761  | 948.586  | 934.245 | 926.643  | 918.799 | 982.493         |

|                                    |                     |                     |                      |                     |                      |                     |                     |
|------------------------------------|---------------------|---------------------|----------------------|---------------------|----------------------|---------------------|---------------------|
| 318.15                             | 966.197             | 953.402             | 944.364              | 930.110             | 922.589              | 914.809             | 978.072             |
| 323.15                             | 961.737             | 949.031             | 940.130              | 925.984             | 918.522              | 910.810             | 973.633             |
| 328.15                             | 957.264             | 944.648             | 935.880              | 921.830             | 914.444              | 906.801             | 969.174             |
| 333.15                             | 952.776             | 940.248             | 931.615              | 917.648             | 910.352              | 902.775             | 964.697             |
| 338.15                             | 948.270             | 935.830             | 927.331              | 913.443             | 906.244              | 898.738             | 960.200             |
| 343.15                             | 943.743             | 931.393             | 923.024              | 909.257             | 902.118              | 894.683             | 955.684             |
| % AARD                             | 0.224               | 0.554               | 0.492                | 0.989               | 0.765                | 0.563               | 0.107               |
| <b><math>u/m.s^{-1}</math></b>     |                     |                     |                      |                     |                      |                     |                     |
| <b>T/K</b>                         | <b>BMAPRO</b>       | <b>BMABUT</b>       | <b>BMAPEN<br/>T</b>  | <b>BMAHE<br/>X</b>  | <b>BMAHEP<br/>T</b>  | <b>BMAOC<br/>T</b>  | <b>BDMAA<br/>CE</b> |
| 293.15                             | 1549.53             | 1534.51             | 1512.38              | 1502.60             | 1494.04              | 1485.82             | 1433.07             |
| 298.15                             | 1530.76             | 1514.27             | 1492.96              | 1483.19             | 1475.61              | 1467.10             | 1413.97             |
| 303.15                             | 1512.36             | 1494.44             | 1473.74              | 1464.03             | 1457.12              | 1448.62             | 1394.96             |
| 308.15                             | 1494.33             | 1474.96             | 1454.78              | 1445.12             | 1438.40              | 1430.34             | 1376.11             |
| 313.15                             | 1476.18             | 1455.70             | 1435.91              | 1426.36             | 1420.28              | 1412.22             | 1357.47             |
| 318.15                             | 1458.56             | 1436.61             | 1417.14              | 1407.69             | 1402.30              | 1394.21             | 1339.06             |
| 323.15                             | 1441.01             | 1417.61             | 1398.46              | 1389.10             | 1384.37              | 1376.29             | 1320.82             |
| 328.15                             | 1423.55             | 1398.69             | 1379.81              | 1370.61             | 1366.54              | 1358.41             | 1302.67             |
| 333.15                             | 1406.14             | 1379.82             | 1361.18              | 1352.17             | 1348.77              | 1340.62             | 1284.63             |
| 338.15                             | 1388.69             | 1361.02             | 1342.64              | 1333.79             | 1330.94              | 1322.88             | 1266.70             |
| 343.15                             | 1371.33             | 1342.27             | 1324.19              | 1315.47             | 1313.04              | 1305.21             | 1248.90             |
| <b><math>\rho/kg.m^{-3}</math></b> |                     |                     |                      |                     |                      |                     |                     |
| <b>T/K</b>                         | <b>BDMAPR<br/>O</b> | <b>BDMABU<br/>T</b> | <b>BDMAPE<br/>NT</b> | <b>BDMAH<br/>EX</b> | <b>BDMAHE<br/>PT</b> | <b>BDMAO<br/>CT</b> |                     |
| 293.15                             | 1429.66             | 1413.13             | 1409.76              | 1406.74             | 1406.55              | 1408.60             |                     |
| 298.15                             | 1410.36             | 1394.07             | 1391.48              | 1388.19             | 1388.56              | 1390.48             |                     |
| 303.15                             | 1391.13             | 1375.10             | 1372.95              | 1369.81             | 1369.95              | 1372.41             |                     |
| 308.15                             | 1372.11             | 1356.32             | 1354.61              | 1351.69             | 1351.83              | 1354.48             |                     |
| 313.15                             | 1353.36             | 1337.78             | 1336.13              | 1333.84             | 1333.89              | 1336.75             |                     |
| 318.15                             | 1334.87             | 1319.40             | 1318.15              | 1316.10             | 1316.17              | 1319.16             |                     |
| 323.15                             | 1316.46             | 1301.14             | 1300.29              | 1298.45             | 1298.62              | 1301.69             |                     |
| 328.15                             | 1298.17             | 1283.05             | 1282.55              | 1280.83             | 1281.18              | 1284.34             |                     |
| 333.15                             | 1279.97             | 1265.07             | 1264.92              | 1263.33             | 1263.79              | 1267.11             |                     |
| 338.15                             | 1261.83             | 1247.19             | 1247.38              | 1245.90             | 1246.50              | 1249.98             |                     |
| 343.15                             | 1243.82             | 1229.42             | 1229.95              | 1228.60             | 1229.32              | 1232.95             |                     |

4) **Table S3.** Parameters for quadratic correlations of experimental data

$$\rho = A_1 + B_1T + C_1T^2$$

$$u = A_2 + B_2T + C_2T^2$$

| <b><math>\rho/kg.m^{-3}</math></b>     |                    |               |                     |               |                     |               |                     |
|----------------------------------------|--------------------|---------------|---------------------|---------------|---------------------|---------------|---------------------|
|                                        | <b>BMAPR<br/>O</b> | <b>BMABUT</b> | <b>BMAPEN<br/>T</b> | <b>BMAHEX</b> | <b>BMAHEP<br/>T</b> | <b>BMAOCT</b> | <b>BDMAAC<br/>E</b> |
| <b><math>A_1 \times 10^{-3}</math></b> | 1.23               | 1.20          | 1.19                | 1.18          | 1.16                | 1.18          | 1.25                |
| <b><math>B_1 \times 10</math></b>      | -4.64              | -3.96         | -4.41               | -4.71         | -4.32               | -6.72         | -8.10               |
| <b><math>C_1 \times 10^4</math></b>    | -6.81              | -7.24         | -6.46               | -5.95         | -6.03               | -2.06         | -1.30               |

|                                |                       |                       |                       |                       |                       |                       |                       |
|--------------------------------|-----------------------|-----------------------|-----------------------|-----------------------|-----------------------|-----------------------|-----------------------|
| <b>% AARD</b>                  | $6.72 \times 10^{-4}$ | $1.08 \times 10^{-3}$ | $5.36 \times 10^{-4}$ | $1.09 \times 10^{-3}$ | $6.54 \times 10^{-4}$ | $5.74 \times 10^{-3}$ | $5.89 \times 10^{-4}$ |
|                                | <b>BDMAPRO</b>        | <b>BDMABUT</b>        | <b>BDMAPE NT</b>      | <b>BDMAHE X</b>       | <b>BDMAHE PT</b>      | <b>BDMAOC T</b>       |                       |
| $A_1 \times 10^{-3}$           | 1.23                  | 1.21                  | 1.19                  | 1.17                  | 1.16                  | 1.15                  |                       |
| $B_1 \times 10$                | -7.49                 | -7.24                 | -6.82                 | -6.91                 | -6.76                 | -6.69                 |                       |
| $C_1 \times 10^4$              | -2.25                 | -2.36                 | -2.58                 | -2.17                 | -2.16                 | -2.06                 |                       |
| <b>% AARD</b>                  | $7.02 \times 10^{-4}$ | $7.03 \times 10^{-4}$ | $5.90 \times 10^{-4}$ | $1.20 \times 10^{-3}$ | $6.05 \times 10^{-4}$ | $5.04 \times 10^{-4}$ |                       |
| <b><math>u/m.s^{-1}</math></b> |                       |                       |                       |                       |                       |                       |                       |
|                                | <b>BMAPRO</b>         | <b>BMABUT</b>         | <b>BMAPENT</b>        | <b>BMAHE X</b>        | <b>BMAHEPT</b>        | <b>BMAOC T</b>        | <b>BDMAACE</b>        |
| $A_2 \times 10^{-3}$           | 2.89                  | 2.95                  | 2.80                  | 2.81                  | 2.77                  | 2.75                  | 2.82                  |
| $B_2$                          | -5.44                 | -5.66                 | -4.91                 | -5.11                 | -4.95                 | -4.94                 | -5.64                 |
| $C_2 \times 10^3$              | 2.96                  | 2.86                  | 1.82                  | 2.16                  | 2.10                  | 2.09                  | 3.08                  |
| <b>% AARD</b>                  | $1.04 \times 10^{-2}$ | $1.11 \times 10^{-2}$ | $5.71 \times 10^{-3}$ | $6.17 \times 10^{-3}$ | $9.46 \times 10^{-3}$ | $5.83 \times 10^{-3}$ | $4.25 \times 10^{-3}$ |
|                                | <b>BDMAPRO</b>        | <b>BDMABUT</b>        | <b>BDMAPE NT</b>      | <b>BDMAHE X</b>       | <b>BDMAHEPT</b>       | <b>BDMAOCT</b>        |                       |
| $A_2 \times 10^{-3}$           | 2.82                  | 2.79                  | 2.74                  | 2.7                   | 2.74                  | 2.70                  |                       |
| $B_2$                          | -5.65                 | -5.60                 | -5.34                 | -5.18                 | -5.39                 | -5.17                 |                       |
| $C_2 \times 10^3$              | 3.05                  | 3.04                  | 2.74                  | 2.55                  | 2.91                  | 2.61                  |                       |
| <b>% AARD</b>                  | $7.03 \times 10^{-3}$ | $3.72 \times 10^{-3}$ | $6.46 \times 10^{-3}$ | $7.38 \times 10^{-3}$ | $7.70 \times 10^{-3}$ | $2.20 \times 10^{-3}$ |                       |

5) **Table S4.** Consistency of Constitutive properties and Wada's formulism in context to ionic liquids

| <b>Benzylic Quats</b> | <b><math>A</math> cal. from lit. contributions (Wada, 1949)</b> | <b>%ARD for <math>A</math> contributions(Wada, 1949)</b> |
|-----------------------|-----------------------------------------------------------------|----------------------------------------------------------|
| <b>BMAPRO</b>         | 115.7                                                           | 44.59                                                    |
| <b>BMABUT</b>         | 124.8                                                           | 43.96                                                    |
| <b>BMAPENT</b>        | 133.9                                                           | 43.21                                                    |
| <b>BMAHEX</b>         | 143.0                                                           | 42.55                                                    |
| <b>BMAHEPT</b>        | 152.1                                                           | 42.09                                                    |
| <b>BMAOCT</b>         | 161.2                                                           | 41.57                                                    |
| <b>BDMAACE</b>        | 116.7                                                           | 44.83                                                    |
| <b>BDMAPRO</b>        | 125.8                                                           | 44.14                                                    |
| <b>BDMABUT</b>        | 134.9                                                           | 43.67                                                    |
| <b>BDMAPENT</b>       | 144.0                                                           | 43.16                                                    |
| <b>BDMAHEX</b>        | 153.1                                                           | 41.94                                                    |
| <b>BDMAHEPT</b>       | 162.2                                                           | 41.40                                                    |
| <b>BDMAOCT</b>        | 171.3                                                           | 40.74                                                    |
